# Supplementary material for: Solvent-driven dimensionality control in molecular systems containing CuII, 2,2′-bipyridine and an oxamato-based ligand
Source: Royal Society of Chemistry journal article supplement (doi:10.1039/c3ce41783b), 2013-01-01
Supplement: c3ce41783b.pdf [file c3ce41783b.pdf]

## Solvent-Driven Dimensionality Control in Molecular Systems Containing Cu<sup>II</sup>, 2,2'-Bipyridine, and an Oxamato-Based Ligand

Tatiana R. G. Simões,<sup>†</sup> Wallace D. do Pim,<sup>†</sup> Ingrid F. Silva,<sup>†</sup> Willian X. C. Oliveira,<sup>†</sup>  
Carlos B. Pinheiro,<sup>‡</sup> Cynthia L. M. Pereira,<sup>†</sup> Francesc Lloret,<sup>§</sup> Miguel Julve,<sup>§</sup> and  
Humberto O. Stumpf<sup>\*,†</sup>

<sup>†</sup> Departamento de Química, ICEX, Universidade Federal de Minas Gerais, Av. Antônio Carlos  
6627, Belo Horizonte-MG, 31270-901, Brazil.

<sup>‡</sup> Departamento de Física, ICEX, Universidade Federal de Minas Gerais, Av. Antônio Carlos  
6627, Belo Horizonte-MG, 31270-901, Brazil.

<sup>§</sup> Departament de Química Inorgànica/Institut de Ciència Molecular, Facultat de Química de la  
Universitat de València, C/ Catedrático José Beltrán 2, 46980-Paterna (València), Spain.

### Corresponding author

\*E-mail: H.O.S., [stumpf@ufmg.br](mailto:stumpf@ufmg.br); M.J., [miguel.julve@uv.es](mailto:miguel.julve@uv.es).

## Supporting Information

### Analyses of 1

Calcd for C<sub>40</sub>H<sub>32</sub>Cu<sub>2</sub>N<sub>8</sub>O<sub>14</sub> (**1**): C, 49.23; H, 3.31; N, 11.48; Cu, 13.02. Found: C, 48.86;  
H, 3.39; N, 11.24; Cu, 14.10%.

IR (KBr): 3085, 3253s, 1682s, 1633, 1602, 1445, 1353, 763, 726.

### Analyses of 2

Calcd for C<sub>22</sub>H<sub>20</sub>CuN<sub>4</sub>O<sub>7</sub>S (**2**): C, 48.22; H, 3.68; N, 10.22; Cu, 11.60. Found: C, 47.48;  
H, 3.83; N, 9.87; Cu, 11.17%.

IR (KBr): 3075s, 3351, 1685, 1659, 1636, 1605, 1447, 1361, 1031, 774, 728

**Table S1:** Crystallographic parameters of compounds **1-2**

|                                                                                    | <b>1</b>                                                                                            | <b>2</b>                                                            |
|------------------------------------------------------------------------------------|-----------------------------------------------------------------------------------------------------|---------------------------------------------------------------------|
| Empirical Formula                                                                  | C <sub>40</sub> H <sub>28</sub> Cu <sub>2</sub> N <sub>8</sub> O <sub>12</sub> ·2(H <sub>2</sub> O) | C <sub>21</sub> H <sub>17</sub> CuN <sub>4</sub> O <sub>7</sub> S   |
| F.W.                                                                               | 975.82                                                                                              | 532.99                                                              |
| Crystal size (mm)                                                                  | 0.13 × 0.10 × 0.03                                                                                  | 0.72 × 0.15 × 0.09                                                  |
| Crystal System                                                                     | Monoclinic                                                                                          | Orthorhombic,                                                       |
| Space group                                                                        | <i>P2<sub>1</sub>/n</i>                                                                             | <i>Pcca</i>                                                         |
| T(K)                                                                               | 150(2)                                                                                              | 293 K                                                               |
| <i>a</i> (Å)                                                                       | 11.030 (2)                                                                                          | 13.5402 (8)                                                         |
| <i>b</i> (Å)                                                                       | 13.570 (3)                                                                                          | 11.3945 (7)                                                         |
| <i>c</i> (Å)                                                                       | 13.623 (3)                                                                                          | 16.0434 (9)                                                         |
| $\alpha$ (Å)                                                                       | 90°                                                                                                 | 90°                                                                 |
| $\beta$ (Å)                                                                        | 113.40 (3)°                                                                                         | 90°                                                                 |
| $\gamma$ (Å)                                                                       | 90°                                                                                                 | 90°                                                                 |
| <i>V</i> (Å <sup>3</sup> )                                                         | 1871.4 (6)                                                                                          | 2475.2 (3)                                                          |
| <i>Z</i>                                                                           | 2                                                                                                   | 4                                                                   |
| <i>D</i> <sub>calcd</sub> (g cm <sup>-3</sup> )                                    | 1.732                                                                                               | 1.430                                                               |
| $\mu$ (mm <sup>-1</sup> )                                                          | 2.158                                                                                               | 1.013                                                               |
| <i>F</i> (000)                                                                     | 996                                                                                                 | 1088                                                                |
| Index ranges                                                                       | -13 ≤ <i>h</i> ≤ 13,<br>-14 ≤ <i>k</i> ≤ 15,<br>-16 ≤ <i>l</i> ≤ 16                                 | -16 ≤ <i>h</i> ≤ 16,<br>-14 ≤ <i>k</i> ≤ 14,<br>-19 ≤ <i>l</i> ≤ 20 |
| Reflections collected                                                              | 33041                                                                                               | 13505                                                               |
| Independent reflections                                                            | 3253 [R(int) = 0.062]                                                                               | 2536 [R(int) = 0.0484]                                              |
| R ( <i>F</i> <sub>o</sub> <sup>2</sup> ) [ <i>I</i> > 2σ( <i>I</i> )]              | 0.0379                                                                                              | 0.0484                                                              |
| R <sub>w</sub> ( <i>F</i> <sub>o</sub> <sup>2</sup> ) [ <i>I</i> > 2σ( <i>I</i> )] | 0.0903                                                                                              | 0.1289                                                              |

**Table S2:** Selected bond distances (Å) and angles (°) for **1**<sup>#</sup>

|           |             |                        |             |
|-----------|-------------|------------------------|-------------|
| Cu1—O1    | 1.9538 (19) | Cu1—O3                 | 1.9840 (19) |
| Cu1—N1    | 1.977 (2)   | Cu1—O5 <sup>i</sup>    | 2.178 (2)   |
| Cu1—N2    | 1.982 (2)   |                        |             |
| O1—Cu1—N1 | 166.15 (9)  | N2—Cu1—O3              | 169.55 (9)  |
| O1—Cu1—N2 | 96.34 (9)   | O1—Cu1—O5 <sup>i</sup> | 89.56 (8)   |
| N1—Cu1—N2 | 82.04 (10)  | N1—Cu1—O5 <sup>i</sup> | 104.28 (9)  |
| O1—Cu1—O3 | 83.51 (8)   | N2—Cu1—O5 <sup>i</sup> | 95.43 (9)   |
| N1—Cu1—O3 | 95.59 (9)   | O3—Cu1—O5 <sup>i</sup> | 95.01 (8)   |

Hydrogen bonds<sup>\*,&</sup>

| D—H...A                     | D—H / Å  | H...A / Å | D...A / Å | D—H...A / ° |
|-----------------------------|----------|-----------|-----------|-------------|
| O7—H7A...O6                 | 0.88 (2) | 1.91 (2)  | 2.744 (3) | 159 (4)     |
| O7—H7B...O5 <sup>ii</sup>   | 0.87 (2) | 1.93 (2)  | 2.799 (3) | 176 (4)     |
| N3—H3...O7 <sup>iii</sup>   | 0.86     | 2.04      | 2.865 (3) | 162         |
| C14—H14...O7 <sup>iii</sup> | 0.93     | 2.32      | 3.111 (4) | 143         |
| N4—H4...O2 <sup>iv</sup>    | 0.86     | 2.09      | 2.940 (3) | 168         |
| C16—H16...O1 <sup>iv</sup>  | 0.93     | 2.59      | 3.511 (4) | 170         |

<sup>#</sup>Estimated standard deviations in the last significant digits are given in parentheses. \*D and A stand for donor and acceptor, respectively. & Symmetry code: (i) -x, -y+1, -z+2; (ii) -x, -y+1, -z+3; (iii) -x+1/2, y-1/2, -z+5/2; (iv) x-1/2, -y+1/2, z+1/2.

**Table S3:** Selected bond distances (Å) and angles (°) for **2**<sup>#</sup>

|                        |             |                                      |             |
|------------------------|-------------|--------------------------------------|-------------|
| Cu1—O1                 | 1.983 (2)   | Cu1—N1 <sup>i</sup>                  | 2.005 (3)   |
| Cu1—O1 <sup>i</sup>    | 1.983 (2)   | Cu1—O3                               | 2.333 (2)   |
| Cu1—N1                 | 2.005 (3)   | Cu1—O3 <sup>i</sup>                  | 2.333 (2)   |
| O1—Cu1—O1 <sup>i</sup> | 93.23 (15)  | N1—Cu1—O3                            | 95.72 (11)  |
| O1—Cu1—N1              | 93.12 (11)  | N1—Cu1—N1 <sup>i</sup>               | 81.29 (16)  |
| O1—Cu1—N1 <sup>i</sup> | 171.09 (11) | N1—Cu1—O3 <sup>i</sup>               | 96.41 (10)  |
| O1—Cu1—O3 <sup>i</sup> | 91.77 (10)  | N1 <sup>i</sup> —Cu1—O3 <sup>i</sup> | 95.73 (11)  |
| O1—Cu1—O3              | 77.16 (9)   | O3—Cu1—O3 <sup>i</sup>               | 163.98 (13) |

Hydrogen bonds<sup>\*,&</sup>

| D—H...A    | D—H / Å | H...A / Å | D...A / Å | D—H...A / ° |
|------------|---------|-----------|-----------|-------------|
| N2—H2...O4 | 0.86    | 2.18      | 2.979 (4) | 155         |
| C5—H5...O4 | 0.93    | 2.60      | 3.255 (5) | 128         |

<sup>#</sup>Estimated standard deviations in the last significant digits are given in parentheses. \*D and A stand for donor and acceptor, respectively. & Symmetry code: (i) -x+3/2, -y+1, z

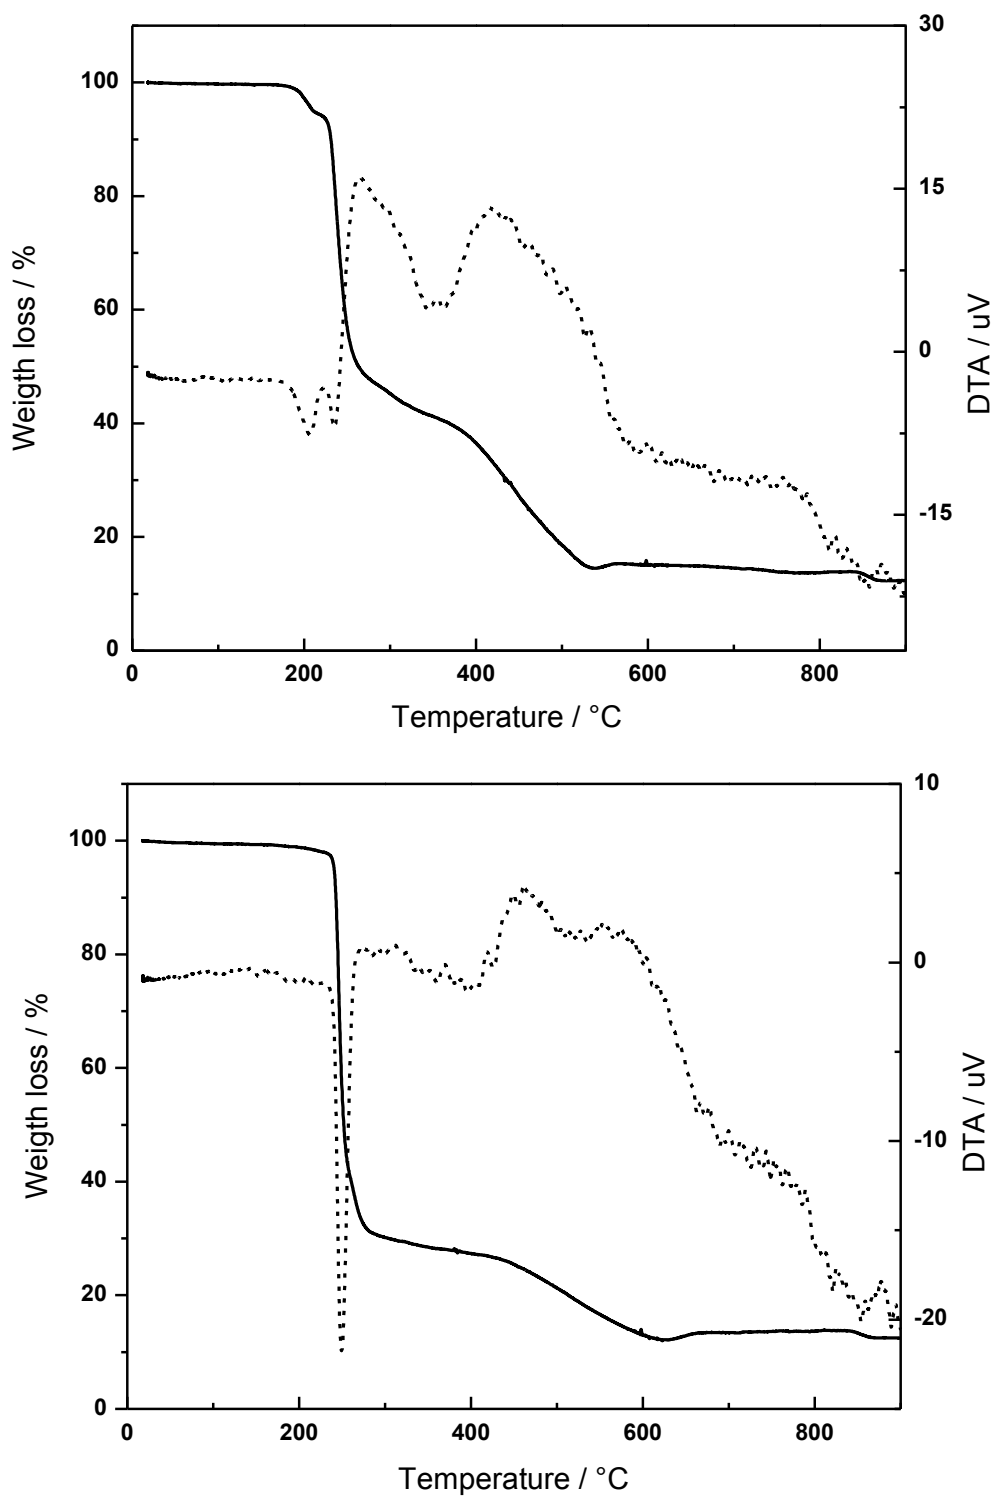

**Figure S1:** Thermogravimetric (full line) and differential thermal analyses (dash lines) for **1**(top) and **2**(bottom).

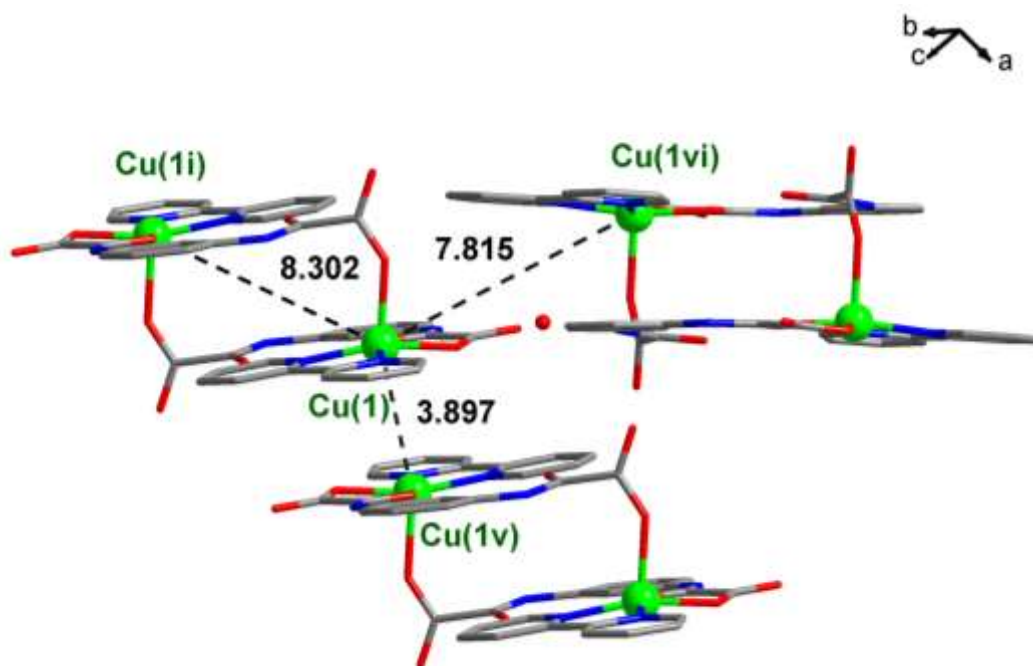

**Figure S2:** Intra and Intermolecular copper distances in **1**; symmetry codes (i) =  $-x, -y+1, -z+2$ ; (v) =  $1-x, 1-y, 2-x$  and (vi) =  $1/2-x, -1/2+y, 3/2-z$ .

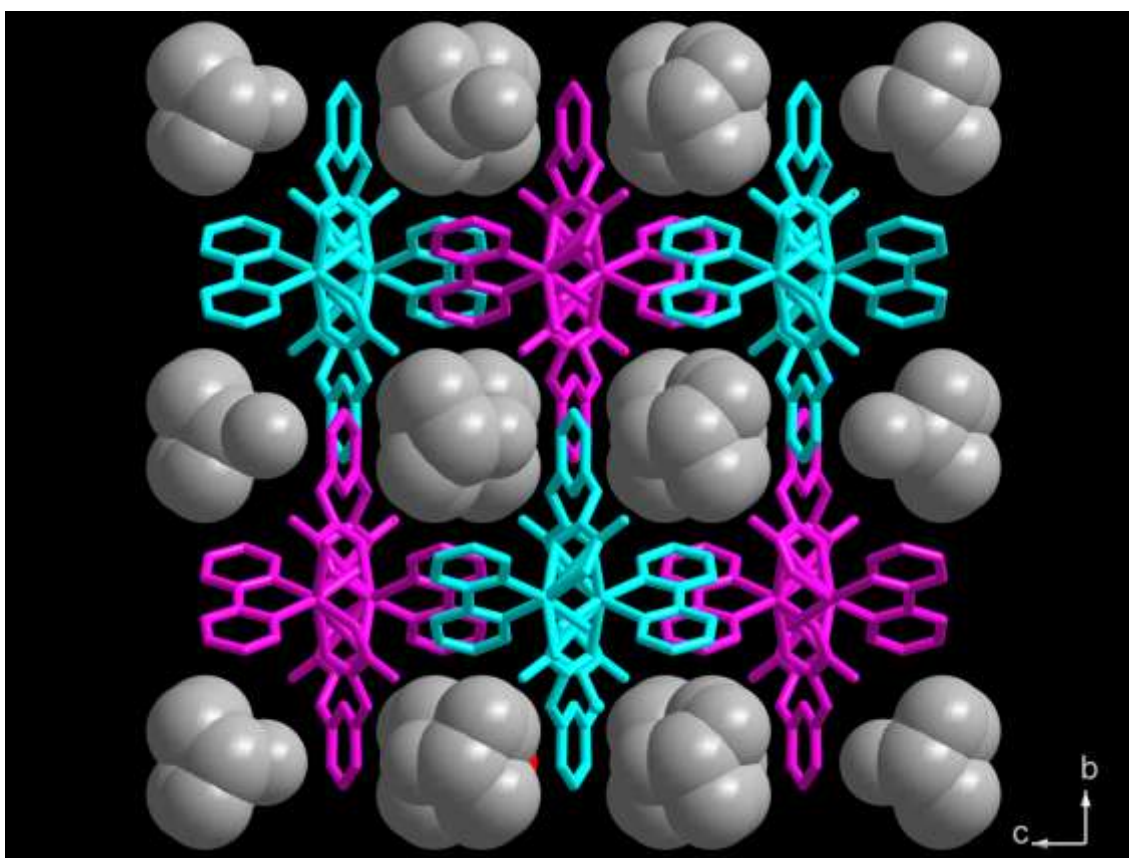

**Figure S3:** View of the packing in **2** down the crystallographic *a* axis showing the dmsO (represented in space-filling) occupancy.
